# Supplementary material for: BET inhibitors synergize with sunitinib in melanoma through GDF15 suppression
Source: PubMed Central journal article supplement (PMC9981764; doi:10.1038/s12276-023-00936-y), 2023-02-01
Supplement: 12276_2023_936_MOESM1_ESM.pdf [file 12276_2023_936_MOESM1_ESM.pdf]

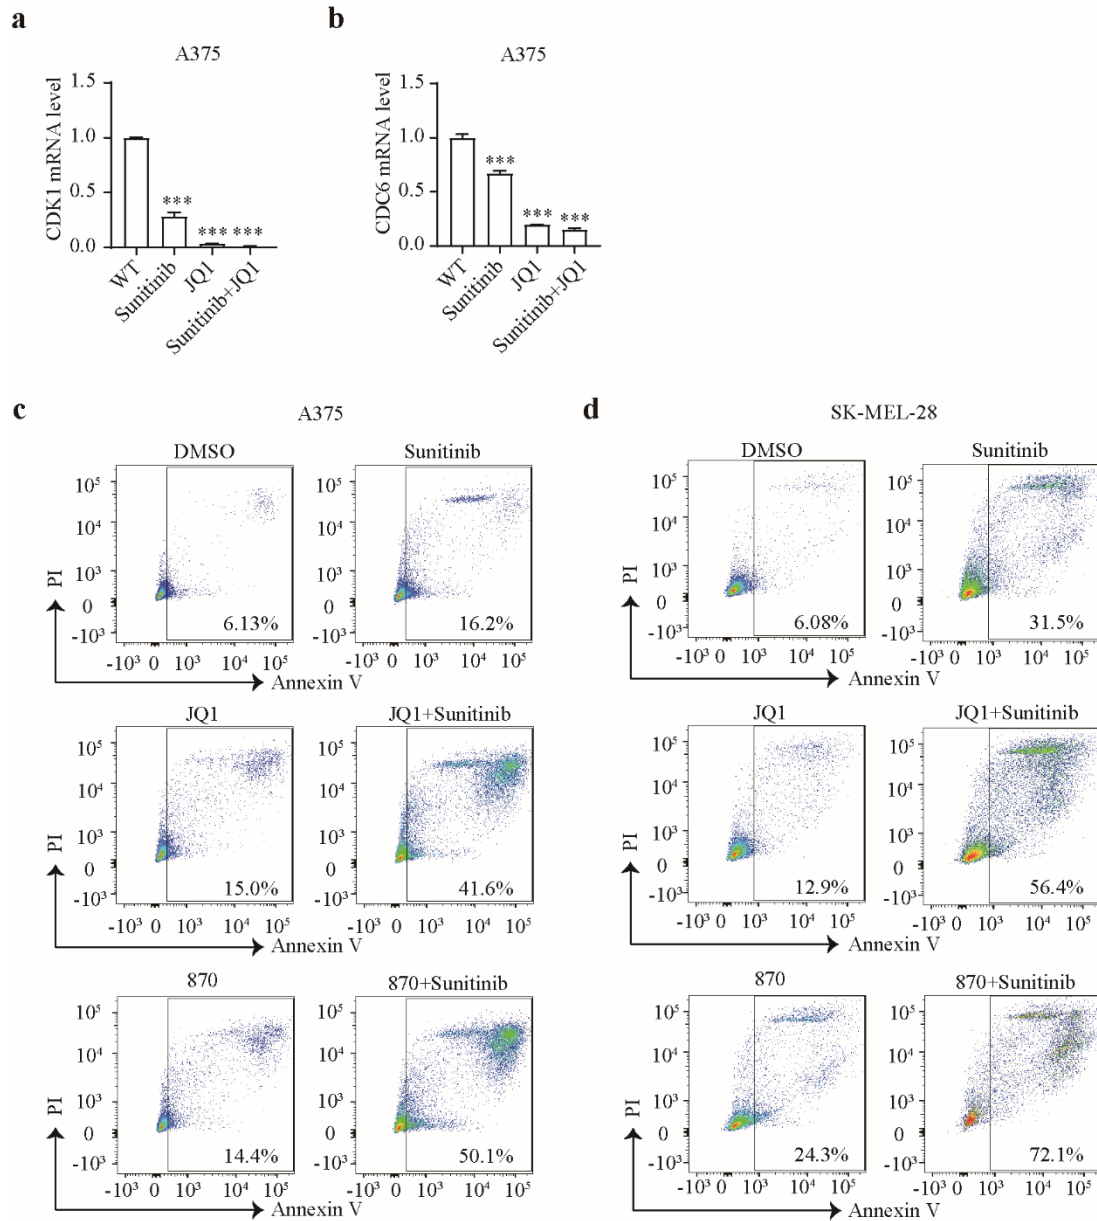

**Supplementary Fig. 1. Sunitinib synergize with BET inhibitors in melanoma. (a-b).** Assessment of CDK1 (a) and CDC6 (b) by RT-PCR in A375 cells after treatment with DMSO, sunitinib (1  $\mu$ M), JQ1 (1  $\mu$ M), or a combination of both drugs. (c-d) Apoptosis of A375 (c) and SK-MEL-28 (d) cells after treatment with sunitinib (1  $\mu$ M) or JQ1 (1  $\mu$ M) / NHWD-870 (10 nM) either alone or in combination for 36 h. P values were calculated using one-way ANOVA analysis. \*\*\*, P < 0.001.

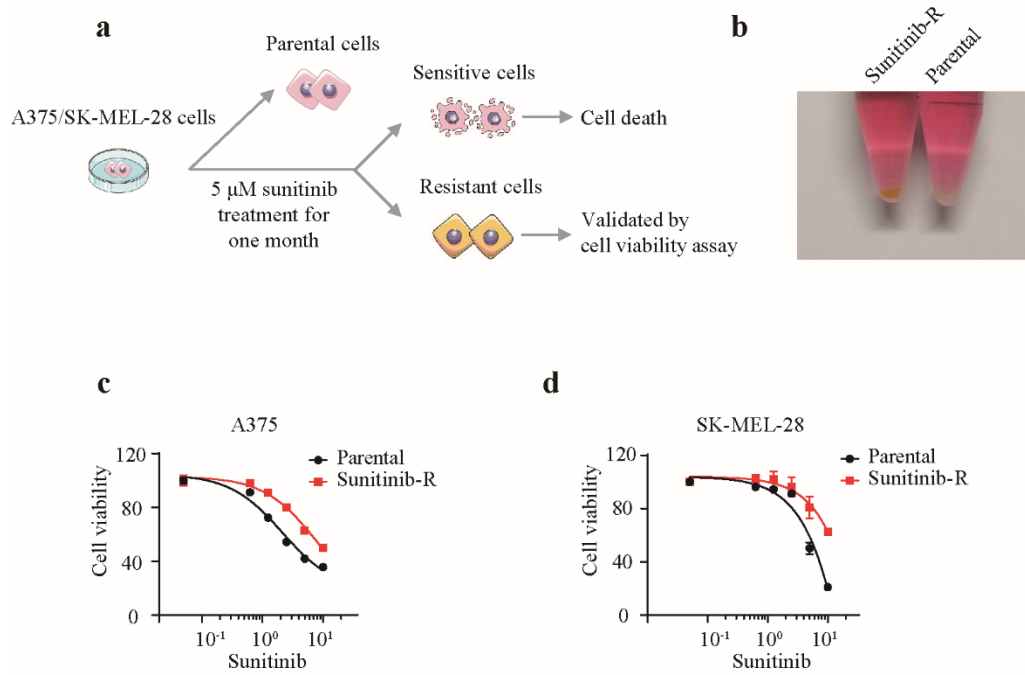

**Supplementary Fig. 2. Construction of sunitinib resistant cells.** (a) Scheme used to generate sunitinib resistant cells. (b) Picture of parental and sunitinib resistant cells. (c-d) Dose response of sunitinib-induced death of parental and sunitinib resistant cells.

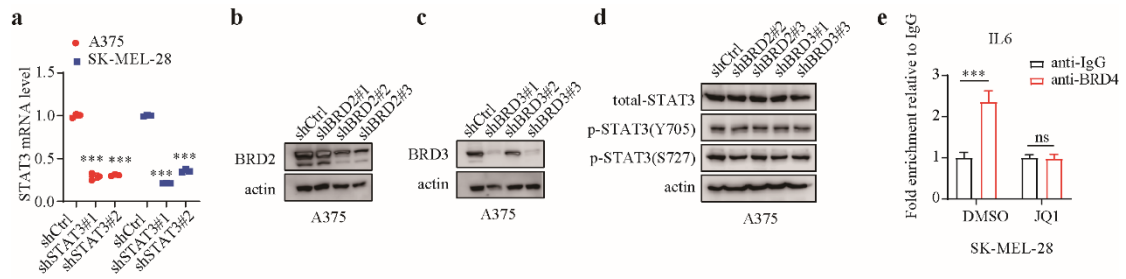

**Supplementary Fig. 3. BET inhibitors repress STAT3 signaling via BRD4/IL6 axis.** (a) Assessment of STAT3 by RT-PCR in A375 and SK-MEL-28 cells after STAT3 silencing. (b) Western blotting analysis of BRD2 in A375 cells after BRD2 silencing. (c) Western blotting analysis of BRD3 in A375 cells after BRD3 silencing. (d) Western blotting analysis of the indicated proteins in A375 cells after BRD2 or BRD3 silencing. (e) ChIP-qPCR analysis of the IL6 promoter in SK-MEL-28 cells with BRD4 or IgG antibody after treatment with DMSO or 1  $\mu$ M JQ1. P values were calculated using one-way ANOVA analysis in **a**. Two-way ANOVA analysis was performed in **e**.\*\*\*,  $P < 0.001$ ; ns, no significance.

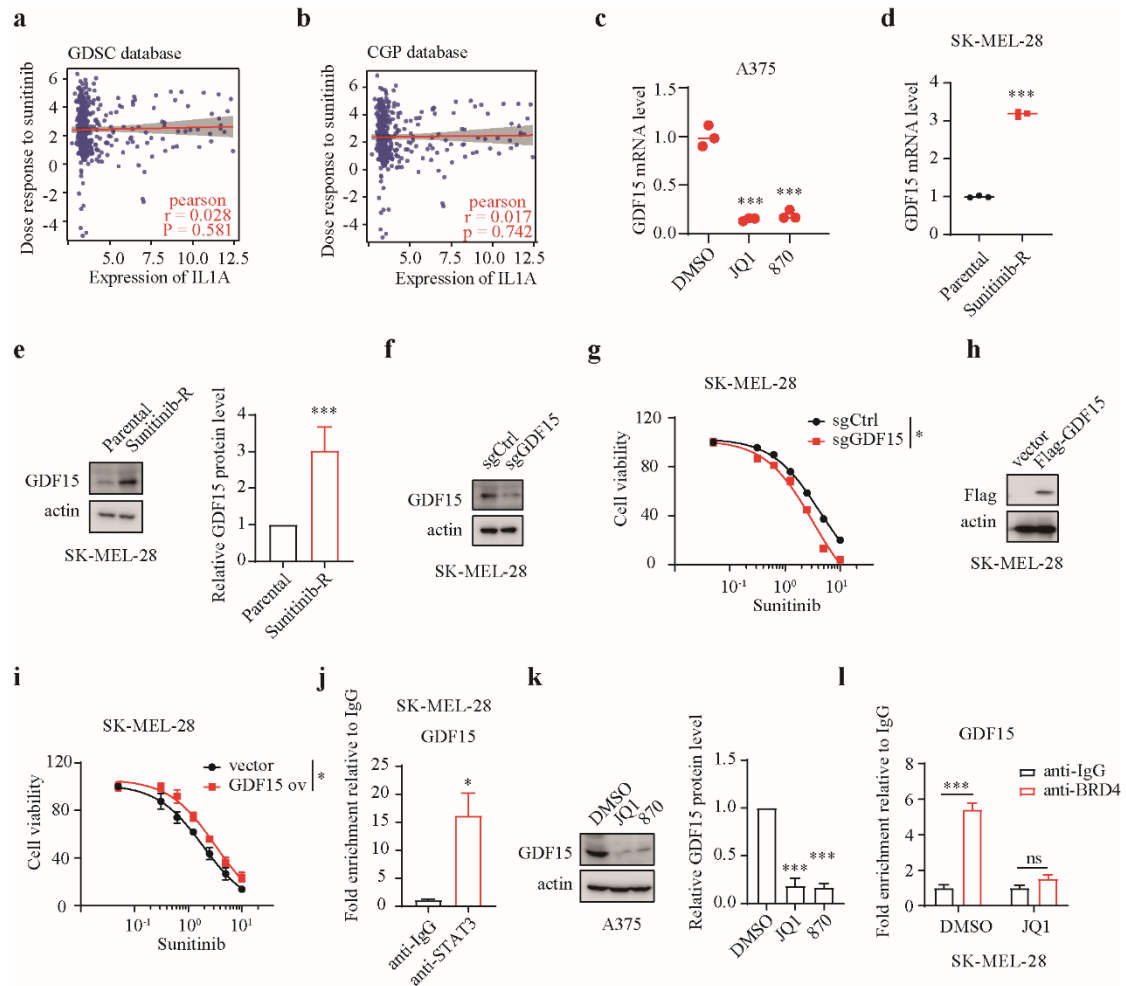

**Supplementary Fig. 4. BET inhibitors regulate sunitinib sensitivity through inhibiting GDF15 expression.** (a-b) Association between expression of IL1A and logIC50 of sunitinib in Genomics of Drug Sensitivity in Cancer (a) and Cancer Genome Project datasets (b). (c) Real-time PCR analysis of GDF15 expression in A375 cells after treatment with DMSO, 1  $\mu$ M JQ1, or 10 nM NHWD-870 for 24 h. (d) GDF15 mRNA level in parental and sunitinib resistant SK-MEL-28 cells. (e) Western blotting and quantitative analysis of GDF15 expression in parental and sunitinib resistant SK-MEL-28 cells. (f) GDF15 protein levels were quantified by western blotting in control (sgCtrl) and GDF15 deficient (sgGDF15) cells. (g) Dose response of sunitinib-induced death of sgCtrl and sgGDF15 SK-MEL-28 cells for 24 h. (h) GDF15 protein levels were quantified by western blotting in control (Flag vector) and GDF15 overexpression (Flag-GDF15) cells. (i) Dose response of sunitinib-induced death of vector and GDF15 overexpression SK-MEL-28 cells for 24 h. (j) Validation of STAT3 binding to the promoter of GDF15 in SK-MEL-28 cells by ChIP-qPCR. (k) Western blotting analysis of GDF15 in A375 cells after JQ1 or NHWD-870 treatment. (l) ChIP-qPCR analysis of the GDF15 promoter in SK-MEL-28 cells with BRD4 or IgG antibody after treatment with DMSO or 1  $\mu$ M JQ1. One-way ANOVA analysis was performed in c and k. Nonlinear regression was applied in g and i. Two-tailed unpaired Student's t-test was performed in d, e, and j. Two-way ANOVA analysis was performed in l. \*,  $P < 0.05$ ; \*\*\*,  $P < 0.001$ ; ns, no significance.

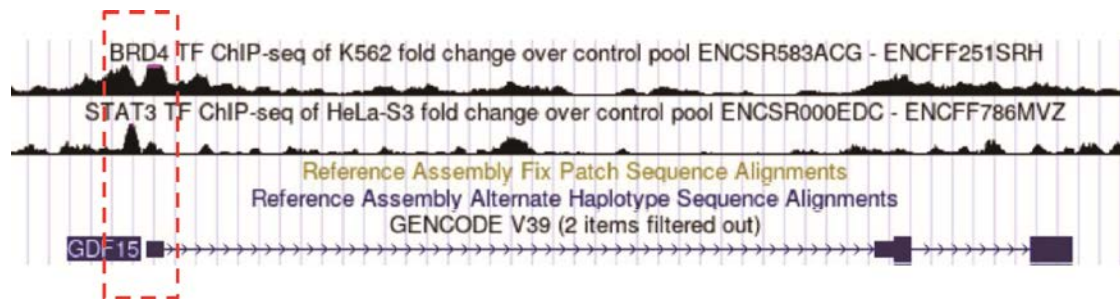

**Supplementary Fig. 5. BRD4 binding peak in GDF15 promoter among K562 cells in GSE101225 (upper) and STAT3 binding peak in GDF15 promoter among HeLa-S3 cells in GSE31477 (lower).**

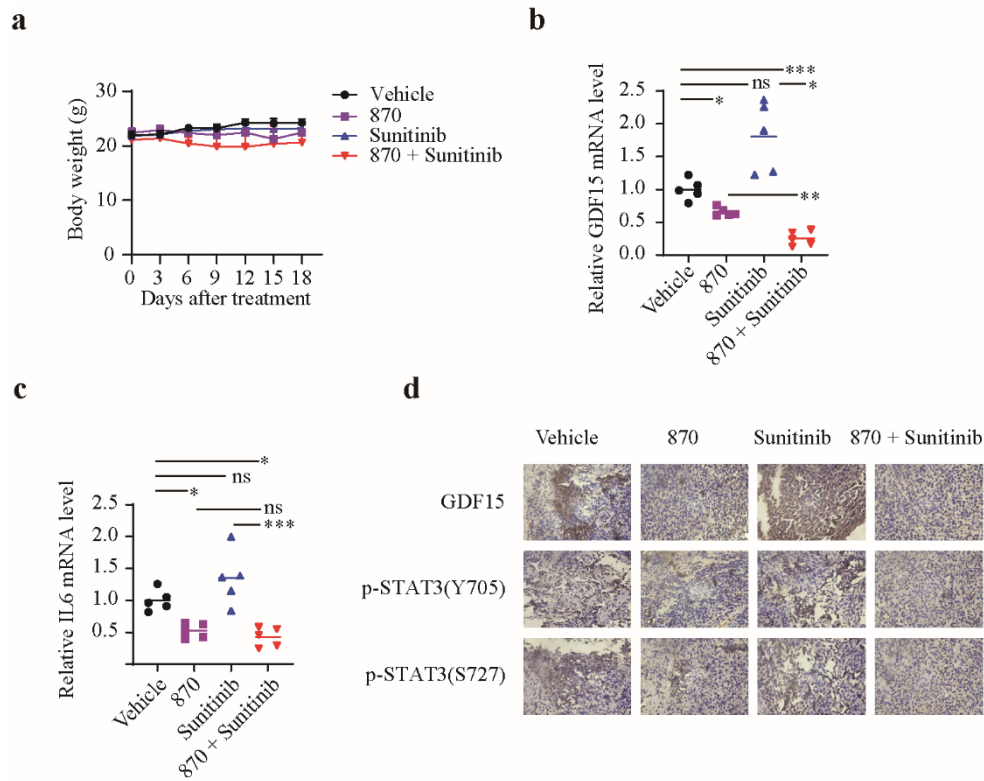

**Supplementary Fig. 6. Combination of BET inhibitors with sunitinib causes melanoma repression in vivo.** (a) Body weight in vehicle, NHWD-870, sunitinib, and combination groups. (b) GDF15 mRNA level quantified by real-time PCR in xenografted tumors. (c) IL6 mRNA level quantified by real-time PCR in xenografted tumors. (d) IHC staining of GDF15, p-STAT3(Y705), and p-STAT3(S727) in the sectioned tumors. P values were calculated using one-way ANOVA analysis. \*,  $P < 0.05$ ; \*\*,  $P < 0.01$ ; \*\*\*,  $P < 0.001$ ; ns, no significance.
